# Supplementary material for: A phosphorus–carbon framework over activated carbon supported palladium nanoparticles for the chemoselective hydrogenation of para-chloronitrobenzene
Source: Royal Society of Chemistry journal article supplement (doi:10.1039/c7cy00157f), 2017-01-01
Supplement: c7cy00157f1.pdf [file c7cy00157f1.pdf]

### Supporting Information

**Table S1.** Element content of the unreduced catalysts, fresh catalysts and used catalysts.

| sample         | Pd wt% (XPS) | Pd wt% (ICP) | P wt% (XPS) | P wt% (ICP) |
|----------------|--------------|--------------|-------------|-------------|
| Pd/C-b         | 2.19         | 1.89         | -           | -           |
| Pd/C           | 2.26         | 2.01         | -           | -           |
| Pd/C-EG-b      | 2.17         | 1.85         | -           | -           |
| Pd/C-EG        | 2.21         | 1.96         | -           | -           |
| Pd/C-P-EG-b    | 2.13         | 1.94         | 0.57        | 0.55        |
| Pd/C-P-EG      | 2.18         | 2.03         | 0.58        | 0.52        |
| Pd/C-P-EG-used | 2.14         | 1.98         | 0.54        | 0.49        |

**Table S2.** Percentage of different forms of phosphorus for Pd/C-P-EG obtained by XPS.

| sample    | P-C /total ratio | phosphate/total ratio | phosphide/total ratio |
|-----------|------------------|-----------------------|-----------------------|
| Pd/C-P-EG | 74%              | 14%                   | 12%                   |

**Supplementary experiment:** Effect of Phosphate on Selectivity

#### Catalyst Preparation

In order to investigate the effect of phosphate on the selectivity of the catalytic reaction for the hydrogenation of p-CNB, the following experiment was carried out. According to the proportion of phosphorus in Pd/C-P-EG catalyst obtained by XPS, sodium phosphate dibasic dodecahydrate (0.0469g) was dissolved into deionized water (15 mL) and then was added to the fresh Pd/C-EG catalyst (5.0001g) which had been previously prepared. After being dried at room temperature for 2 days, the sample was dried at 110°C in a vacuum oven for 8 h and cooled to room temperature. The catalyst was labelled as Pd/C-EG-PO.

**Table S3.** Catalytic performance of Pd/C-EG-PO for the hydrogenation of p-CNB<sup>a</sup>.

| Catalyst   | Temperature (K) | H <sub>2</sub> pressure (MPa) | Reaction time (min) | Reaction rate (mol <sub>sub</sub> H <sup>-1</sup> g <sub>pd</sub> <sup>-1</sup> ) | p-CNB conversion(%) | Selectivity of products(%) |         |
|------------|-----------------|-------------------------------|---------------------|-----------------------------------------------------------------------------------|---------------------|----------------------------|---------|
|            |                 |                               |                     |                                                                                   |                     | p-CAN                      | aniline |
| Pd/C-EG-PO | 363             | 1.0                           | 226                 | 12.6                                                                              | 100                 | 84.76                      | 15.24   |

<sup>a</sup> Reaction conditions: p-CNB, 15.0 g; catalyst, 0.1g; solvent-free.
